# Supplementary material for: Recent acceleration of Denman Glacier (1972–2017), East Antarctica, driven bygrounding line retreat and changes in ice tongue configuration
Source: Copernicus journal article supplement (doi:10.5194/tc-2020-162), 2020-07-06
Supplement: Supplementary file 1 [file tc-2020-162-supplement.pdf]

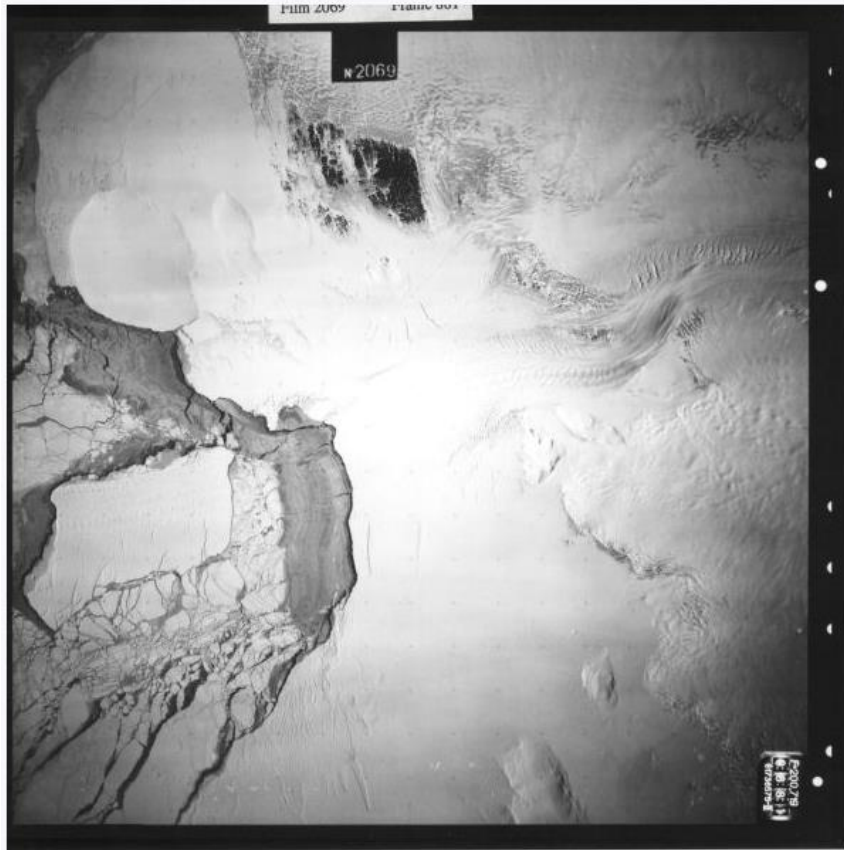

**Supplementary figure 1:** Resurs – KATE-200 image of Denman Glacier taken on September 23<sup>rd</sup> 1984 showing Denman’s last major calving event. The image preview was obtained from the Australian Antarctic Data Centre – Satellite Image Catalogue, but we could not access the full resolution image. [https://data.aad.gov.au/aadc/satellite/display\\_image.cfm?image\\_id=354](https://data.aad.gov.au/aadc/satellite/display_image.cfm?image_id=354)

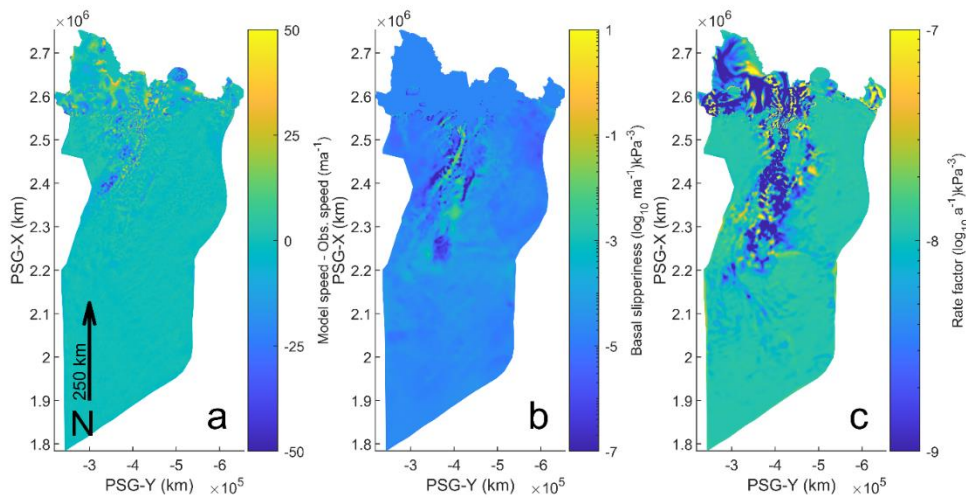

**Supplementary figure 2 - Model validation and inverted parameters:** a) model speed minus 2009 observations, b) basal slipperiness,  $C$ , and c) rate factor,  $A$ .

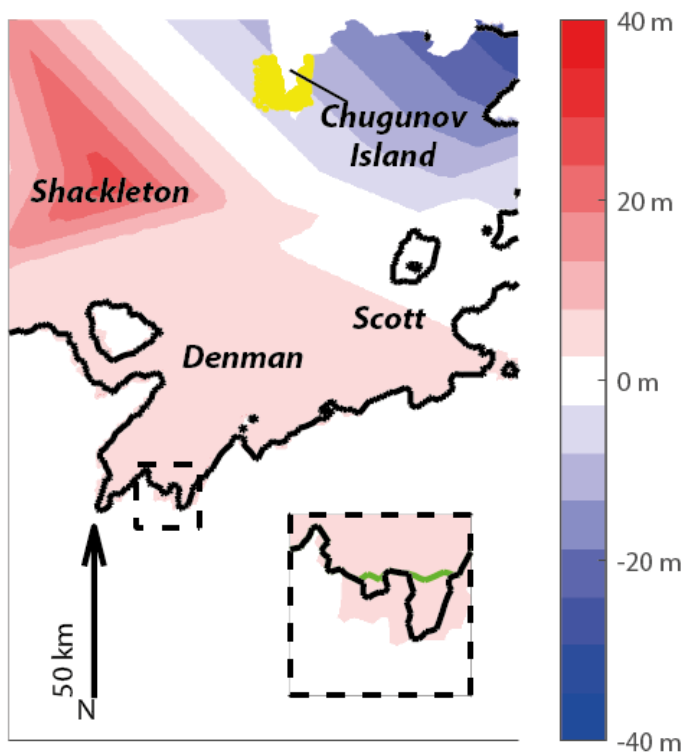

**Supplementary figure 3 - Ice geometry perturbation summary:** Ice geometry is perturbed in three ways; i) ice shelf thickness change (colours, with red, positive values showing where present day ice thickness has been increased to recreate the 1972 ice geometry), ii) grounding line migration (inset, where the present day grounding line (black) has been advanced 10 km to a location representing its estimated 1972 position) and iii) grounding of floating ice on the Chugunov island pinning point (yellow area).
